# Supplementary material
Source: Elsevier journal article supplement (http://www.macglo.com/download/mmc4.pdf)
Supplement: mmc4 [file mmc4.pdf]

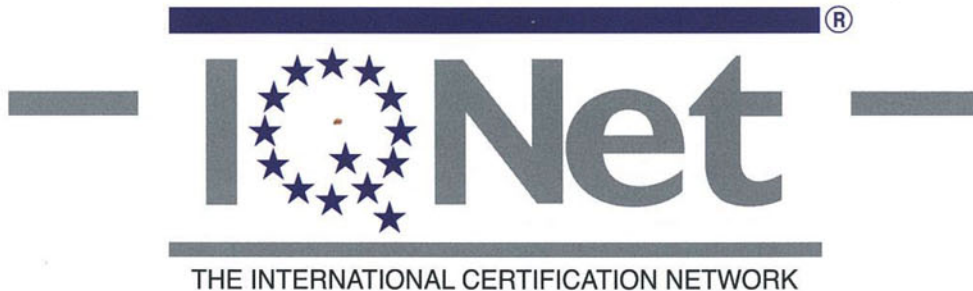

# CERTIFICATE

IQNet and SIRIM QAS International hereby certify that

**MACGLOTECH STEEL SERVICE CENTRE SDN. BHD.**  
(INCLUDING MACGLO STEEL SERVICE CENTRE SDN. BHD.)  
LOT 37901, BATU 6 1/4, JALAN KLINIK  
BUKIT KEMUNING, SEKSYEN 32  
40460 SHAH ALAM  
SELANGOR DARUL EHSAN  
MALAYSIA

has implemented and maintains a

## QUALITY MANAGEMENT SYSTEM

which fulfils the requirements of the following standard

### ISO 9001 : 2008

for the following activities

- 1) MANUFACTURE OF STAMPED METAL PRODUCTS.
- 2) SLITTING, CUTTING AND SHEARING OF STEEL COILS.

Issued on : **01 December 2010**  
Validity date : **26 October 2013**  
Certification Number : **MY-AR 3418**

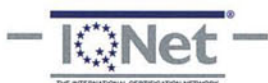

  
**Michael Drechsel**  
President of IQNet

  
**Khalidah Mustafa**  
Managing Director  
SIRIM QAS International Sdn Bhd

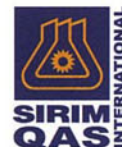

IQNet Partners\*:  
AENOR Spain AFNOR Certification France AIB-Vinçotte International Belgium ANCE Mexico APCER Portugal CCC Cyprus  
CISQ Italy CQC China CQM China CQS Czech Republic Cro Cert Croatia DQS Holding GmbH Germany DS Denmark  
ELOT Greece FCAV Brazil FONDONORMA Venezuela HKQAA Hong Kong China ICONTEC Colombia IMNC Mexico  
Inspecta Certification Finland IRAM Argentina JQA Japan KFQ Korea MSZT Hungary Nemko AS Norway NSAI Ireland  
PCBC Poland Quality Austria Austria RR Russia SII Israel SIQ Slovenia SIRIM QAS International Malaysia SQS Switzerland SRAC Romania  
TEST St Petersburg Russia TSE Turkey YUQS Serbia

IQNet is represented in the USA by: AFNOR Certification, CISQ, DQS Holding GmbH and NSAI Inc.

\* The list of IQNet partners is valid at the time of issue of this certificate. Updated information is available under [www.iqnet-certification.com](http://www.iqnet-certification.com)
